# Supplementary material for: Pharmacological inhibition of TLR4-NOX4 signal protects against neuronal death in transient focal ischemia
Source: PubMed Central journal article supplement — Sci Rep. 2012 Nov 28;2:896. doi: 10.1038/srep00896 (PMC3508453; doi:10.1038/srep00896), 2012-11-28

For submission to *Scientific Reports-Supplementary Information*

# **Pharmacological inhibition of TLR4-NOX4 signal protects against neuronal death in transient focal ischemia**

Yukiya Suzuki<sup>1</sup>, Kozo Hattori<sup>2</sup>, Junya Hamanaka<sup>1</sup>, Tetsuji Murase<sup>2</sup>, Yusuke Egashira<sup>1,3</sup>,  
Keisuke Mishiro<sup>1</sup>, Mitsunori Ishiguro<sup>1,3</sup>, Kazuhiro Tsuruma<sup>1</sup>, Yoshinobu Hirose<sup>4</sup>,  
Hiroyuki Tanaka<sup>5</sup>, Shinichi Yoshimura<sup>3</sup>, Masamitsu Shimazawa<sup>1</sup>, Naoki Inagaki<sup>5</sup>,  
Hideko Nagasawa<sup>2</sup>, Toru Iwama<sup>3</sup>, Hideaki Hara<sup>1</sup>

<sup>1</sup>Molecular Pharmacology, Department of Biofunctional Evaluation, Gifu

Pharmaceutical University, Gifu 501-1196, Japan.

<sup>2</sup> Pharmaceutical and Medicinal Chemistry, Department of Organic and Medicinal

Chemistry, Gifu Pharmaceutical University, Gifu 501-1196, Japan

<sup>3</sup>Department of Neurosurgery, Gifu University Graduate School of Medicine, Gifu

501-1194, Japan.

<sup>4</sup>Department of Pathology, Gifu University Hospital, Gifu 501-1194, Japan.

<sup>5</sup>Pharmacology, Department of Bioactive Molecule, Gifu Pharmaceutical University,

Gifu 501-1196, Japan.

### Supplementary data

<sup>1</sup>H-NMR spectra were obtained with JEOL JNMECA500 spectrometer at 500 MHz frequency in DMSO-d<sub>6</sub> with tetramethylsilane as an internal standard. Chemical shifts are reported in ppm. Coupling constants are reported in Hz. The multiplicity is defined by s (singlet), d (doublet), t (triplet), q (quartet), dt (double triplet), and m (multiplet). The direct analysis in real time (DART)-MS measurements were carried out on a JEOL JMS-T100TD.

{ethyl (6R)-6-[N-(2-chloro-4-fluorophenyl)sulfamoyl]cyclohex-1-ene-1- carboxylate :  
<sup>1</sup>H-NMR (DMSO-d<sub>6</sub>, 500 MHz)  $\delta$ : 1.04 (3H, t,  $J=7.0$  Hz), 1.60-1.64 (1H, m), 1.71-1.79 (1H, m), 2.04-2.23 (2H, m), 2.24 (1H, dt,  $J=20.2, 4.9$  Hz), 2.45 (1H, d,  $J=15.0$  Hz), 2.99 (2H, q,  $J=7.2$  Hz), 4.29 (1H, d,  $J=5.5$  Hz), 7.09 (1H, t,  $J=3.8$  Hz), 7.27 (1H, dt,  $J=8.1, 3.2$  Hz), 7.52-7.56 (2H, m), 9.76 (1H, s). HR-DART-MS  $m/z$ : 362.0680 ( $[M+H]^+$ , Calcd for C<sub>15</sub>H<sub>18</sub>ClFNO<sub>4</sub>S<sup>+</sup>: 362.0624).

TAK-242 DMSO-d6 r.t.

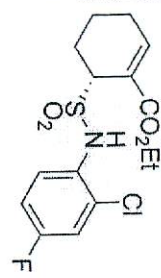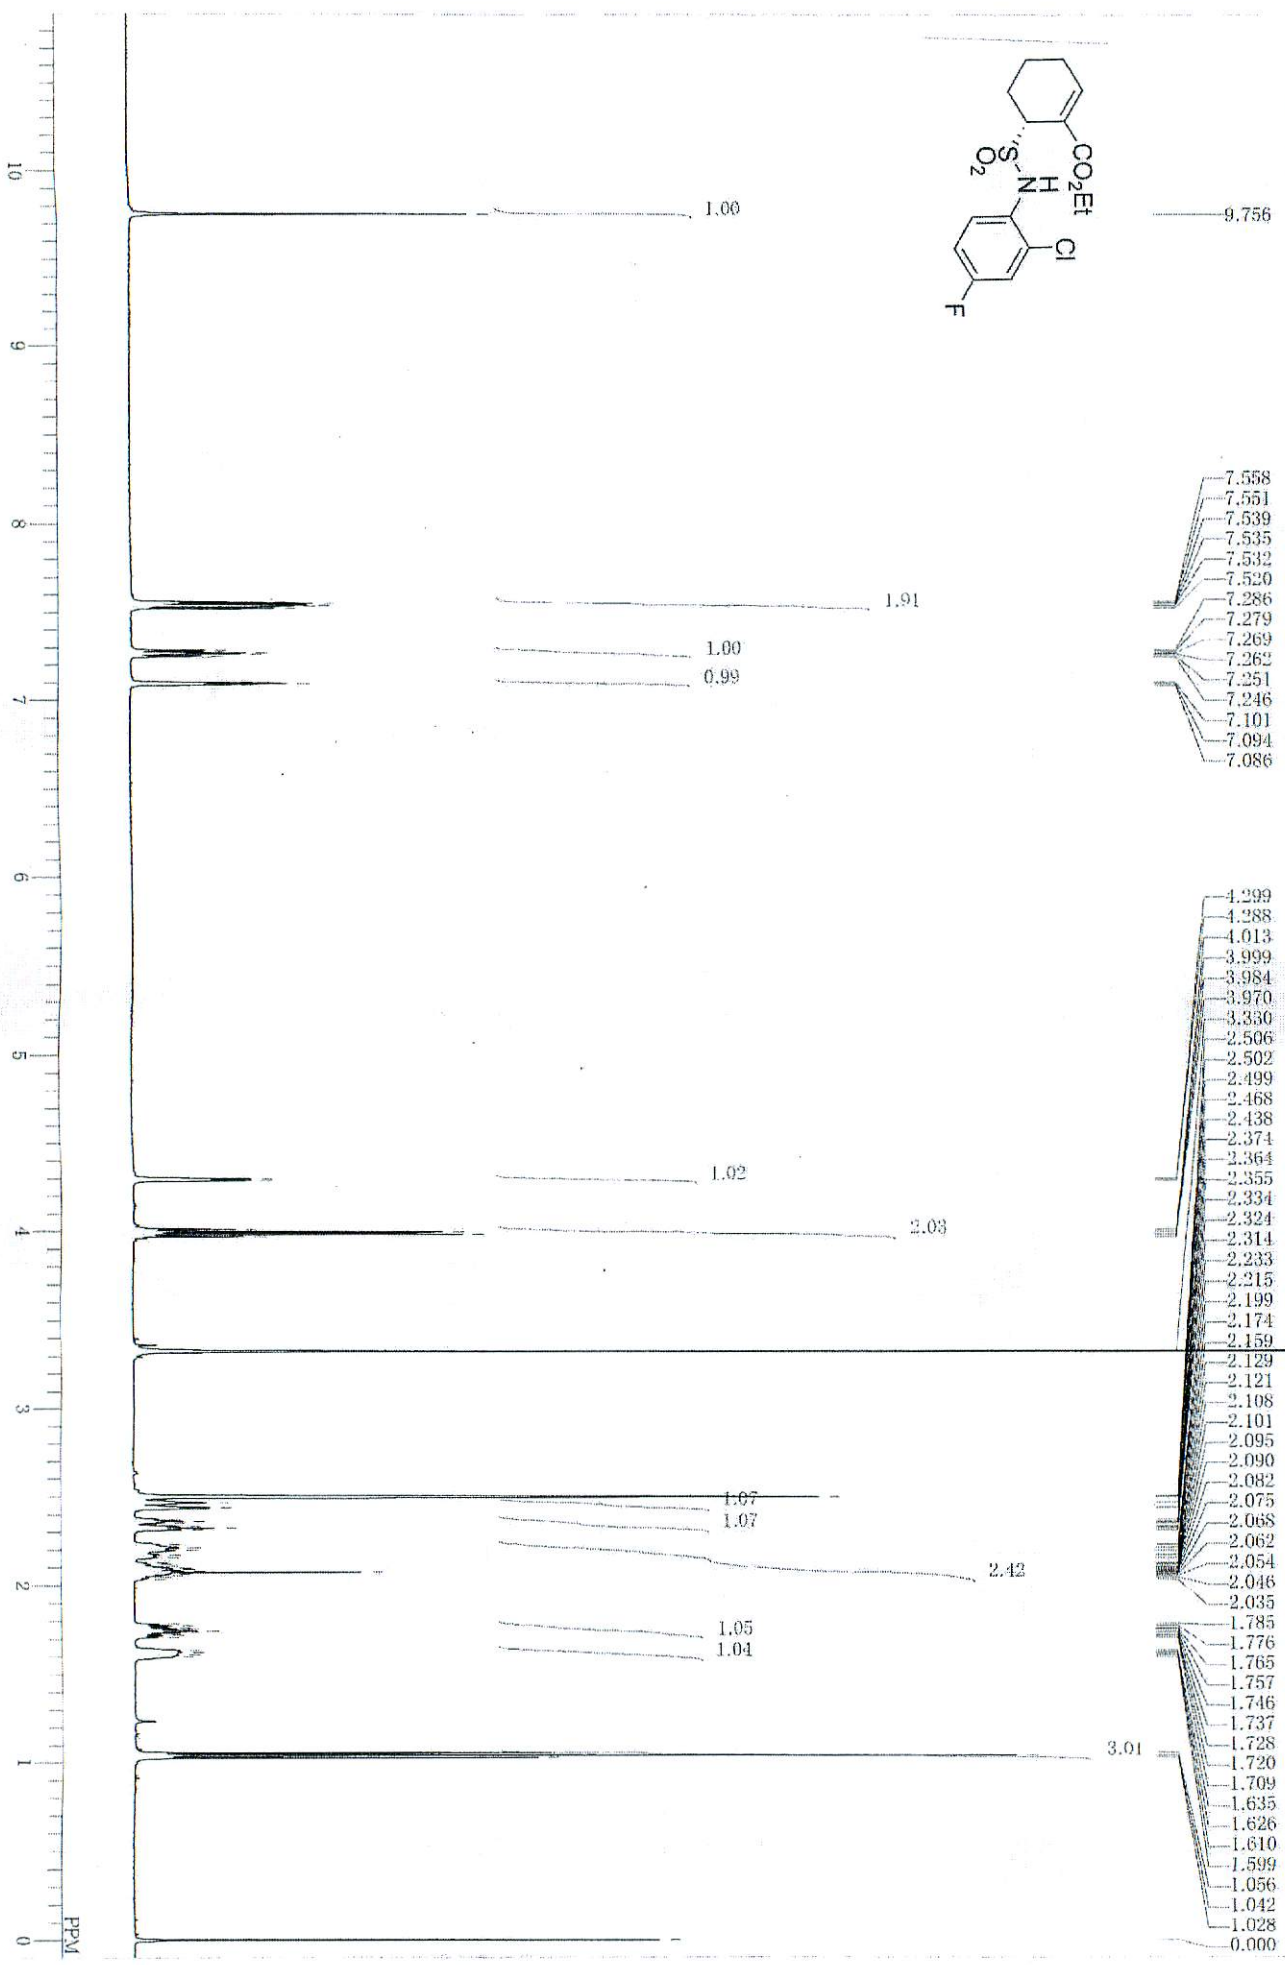

Supplement: srep00896-s1.pdf [file srep00896-s1.pdf]
